# Supplementary material for: Stochastic Processes Are Key Determinants of Short-Term Evolution in Influenza A Virus
Source: PLOS journal article supplement (doi:10.1371/journal.ppat.0020125), 2006-01-01
Supplement: S1 (10.1371/journal.ppat.0020125.s001) [file journal.ppat.0020125.s001]

Table S1. **Data used in this study: 413 isolates of human H3N2 influenza A virus sampled from New York State, 1997-2005.**

| **Isolate** | **GenBank**  **AccessionNumber*** | **Clade** | | | | | | | | | | | | **Date** | | | **Week** | | | | | **Day** | **County** | **Age** | | | | **Sex** | |  |
| --- | --- | --- | --- | --- | --- | --- | --- | --- | --- | --- | --- | --- | --- | --- | --- | --- | --- | --- | --- | --- | --- | --- | --- | --- | --- | --- | --- | --- | --- | --- |
|  | **HA** | | | | | | | | | **NA** | | |  | | | | | | | | | | | | | | | |  |
| *1997-1998 Season* |  |  | | | | | | | | | | | | | | | | | | | | | | | | | | | |  |
| A/New York/501/1997 | CY006450 | I | | | | | III | | | | | 11/26/1997 | | | | | | | 1 | | | 7 | Albany | 88 | | F | | | |  |
| A/New York/503/1997 | CY006234 | I | | | | | II | | | | | 11/29/1997 | | | | | | | 1 | | | 7 | Rensselaer | 41 | | M | | | |  |
| A/New York/505/1997 | CY006242 | I | | | | | III | | | | | 12/2/1997 | | | | | | | 2 | | | 14 | Suffolk | 14 | | F | | | |  |
| A/New York/508/1997 | CY006250 | I | | | | | II | | | | | 12/22/1997 | | | | | | | 5 | | | 35 | Rensselaer | 88 | | F | | | |  |
| A/New York/509/1997 | CY006458 | I | | | | | II | | | | | 12/23/1997 | | | | | | | 5 | | | 35 | Schenectady | 95 | | F | | | |  |
| A/New York/512/1998 | CY006466 | I | | | | | II | | | | | 12/29/1998 | | | | | | | 9 | | | 63 | Saratoga | 80 | | F | | | |  |
| A/New York/515/1997 | CY006282 | I | | | | | II | | | | | 12/21/1997 | | | | | | | 5 | | | 35 | Washington | 7 m | | M | | | |  |
| A/New York/516/1997 | CY006474 | I | | | | | II | | | | | 12/26/1997 | | | | | | | 5 | | | 35 | Erie | ? | | ? | | | |  |
| A/New York/517/1998 | CY006290 | I | | | | | III | | | | | 1/3/1998 | | | | | | | 6 | | | 42 | Steuben | 21 | | M | | | |  |
| A/New York/518/1998 | CY006482 | II | | | | | I | | | | | 1/5/1998 | | | | | | | 7 | | | 49 | Sullivan | 83 | | F | | | |  |
| A/New York/519/1998 | CY006490 | I | | | | | II | | | | | 2/13/1998 | | | | | | | 12 | | | 84 | Albany | 81 | | M | | | |  |
| A/New York/520/1998 | CY006498 | I | | | | | III | | | | | 1/5/1998 | | | | | | | 7 | | | 49 | Tompkins | 25 | | M | | | |  |
| A/New York/521/1998 | CY006506 | I | | | | | I | | | | | 1/19/1998 | | | | | | | 9 | | | 63 | Tompkins | 19 | | F | | | |  |
| A/New York/522/1997 | CY006514 | I | | | | | III | | | | | 12/31/1997 | | | | | | | 6 | | | 42 | Ontario | 76 | | M | | | |  |
| A/New York/523/1998 | CY006522 | I | | | | | II | | | | | 2/2/1998 | | | | | | | 11 | | | 77 | Putnam | 49 | | F | | | |  |
| A/New York/524/1997 | CY006530 | I | | | | | II | | | | | 12/31/1997 | | | | | | | 6 | | | 42 | Otsego | 67 | | M | | | |  |
| A/New York/525/1998 | CY006538 | I | | | | | II | | | | | 3/3/1998 | | | | | | | 15 | | | 105 | Otsego | 88 | | M | | | |  |
| A/New York/528/1998 | CY006546 | I | | | | | III | | | | | 1/8/1998 | | | | | | | 7 | | | 49 | Broome | 78 | | M | | | |  |
| A/New York/531/1998 | CY006554 | I | | | | | II | | | | | 2/22/1998 | | | | | | | 14 | | | 98 | Chenango | 84 | | M | | | |  |
| A/New York/532/1998 | CY006562 | I | | | | | III | | | | | 1/18/1998 | | | | | | | 9 | | | 63 | Chemung | 79 | | ? | | | |  |
| A/New York/533/1998 | CY006570 | I | | | | | III | | | | | 2/1/1998 | | | | | | | 11 | | | 77 | Delaware | 9 | | M | | | |  |
| A/New York/534/1998 | CY006578 | I | | | | | II | | | | | 1/29/1998 | | | | | | | 10 | | | 70 | Chautauqua | 80 | | F | | | |  |
| A/New York/539/1998 | CY006586 | I | | | | | III | | | | | 2/10/1998 | | | | | | | 12 | | | 84 | Cattaraugus | 84 | | M | | | |  |
| A/New York/541/1998 | CY006594 | II | | | | | I | | | | | 3/12/1998 | | | | | | | 16 | | | 112 | Onondaga | 63 | | F | | | |  |
| A/New York/542/1998 | CY006602 | I | | | | | II | | | | | 2/19/1998 | | | | | | | 13 | | | 91 | Essex | 77 | | F | | | |  |
| A/New York/543/1998 | CY006610 | I | | | | | II | | | | | 2/17/1998 | | | | | | | 13 | | | 91 | Albany | 87 | | F | | | |  |
| A/New York/545/1997 | CY006618 | I | | | | | III | | | | | 12/16/1997 | | | | | | | 4 | | | 28 | Suffolk | 5 | | M | | | |  |
| A/New York/546/1998 | CY006626 | I | | | | | III | | | | | 1/26/1998 | | | | | | | 10 | | | 70 | Suffolk | 2 m | | F | | | |  |
| A/New York/547/1997 | CY006634 | I | | | | | II | | | | | 12/28/1997 | | | | | | | 6 | | | 42 | Onondaga | 2 | | F | | | |  |
| A/New York/548/1998 | CY006642 | I | | | | | III | | | | | 2/12/1998 | | | | | | | 12 | | | 84 | Onondaga | 3 | | F | | | |  |
| *1998-1999 Season* |  | | | | | | | | | | | | | | | | | | | | | |  | | | | | | |  |
| A/New York/224/1998 | CY001575 | I | | | | | III | | | | | | | 12/28/1998 | | | | | 9 | | 63 | | Albany | 63 | | | F | | |  |
| A/New York/240/1998 | CY001484 | I | | | | | III | | | | | | | 12/28/1998 | | | | | 9 | | 63 | | Sullivan | ? | | | F | | |  |
| A/New York/247/1998 | CY001511 | IV | | | | | V | | | | | | | 1/2/1998 | | | | | 1 | | 7 | | Kings | 85 | | | F | | |  |
| A/New York/248/1999 | CY001695 | I | | | | | III | | | | | | | 2/2/1999 | | | | | 14 | | 98 | | Kings | ? | | | F | | |  |
| A/New York/249/1998 | CY001492 | I | | | | | III | | | | | | | 12/12/1998 | | | | | 6 | | 42 | | Albany | 19 | | | M | | |  |
| A/New York/250/1998 | CY001500 | V | | | | | I | | | | | | | 12/28/1998 | | | | | 9 | | 63 | | Schenectady | 93 | | | F | | |  |
| A/New York/251/1998 | CY002551 | III | | | | | V | | | | | | | 12/28/1998 | | | | | 9 | | 63 | | Sullivan | 88 | | | M | | |  |
| A/New York/252/1999 | CY002559 | I | | | | | III | | | | | | | 1/12/1999 | | | | | 11 | | 77 | | Rensselaer | 26 | | | F | | |  |
| A/New York/253/1999 | CY001583 | I | | | | | III | | | | | | | 3/26/1999 | | | | | 21 | | 147 | | Rensselaer | 87 | | | F | | |  |
| A/New York/254/1998 | CY002127 | I | | | | | III | | | | | | | 12/31/1998 | | | | | 9 | | 63 | | Greene | 67 | | | F | | |  |
| A/New York/255/1999 | CY001703 | I | | | | | III | | | | | | | 2/10/1999 | | | | | 15 | | 105 | | Greene | 96 | | | M | | |  |
| A/New York/256/1998 | CY001591 | I | | | | | III | | | | | | | 12/30/1998 | | | | | 9 | | 63 | | Chemung | 60 | | | F | | |  |
| A/New York/257/1999 | CY001711 | I | | | | | III | | | | | | | 2/3/1999 | | | | | 14 | | 98 | | Warren | 89 | | | M | | |  |
| A/New York/259/1999 | CY001599 | I | | | | | III | | | | | | | 2/2/1999 | | | | | 14 | | 98 | | Kings | 83 | | | F | | |  |
| A/New York/260/1999 | CY001967 | I | | | | | III | | | | | | | 2/11/1999 | | | | | 15 | | 105 | | St. Lawrence | 47 | | | F | | |  |
| A/New York/261/1999 | CY002567 | I | | | | | III | | | | | | | 4/9/1999 | | | | | 23 | | 161 | | St. Lawrence | 45 | | | F | | |  |
| A/New York/262/1999 | CY001607 | I | | | | | III | | | | | | | 1/25/1999 | | | | | 14 | | 91 | | Herkimer | 84 | | | F | | |  |
| A/New York/263/1999 | CY001420 | VI | | | | | I | | | | | | | 2/10/1999 | | | | | 15 | | 105 | | Cattaragus | 76 | | | M | | |  |
| A/New York/264/1999 | CY001615 | I | | | | | III | | | | | | | 3/3/1999 | | | | | 18 | | 126 | | Cattaragus | 3 | | | M | | |  |
| A/New York/265/1999 | CY001623 | VI | | | | | III | | | | | | | 1/29/1999 | | | | | 13 | | 91 | | Tompkins | 19 | | | M | | |  |
| A/New York/266/1999 | CY002343 | I | | | | | III | | | | | | | 5/6/1999 | | | | | 27 | | 189 | | Tioga | 83 | | | F | | |  |
| A/New York/277/1999 | CY001751 | IV | | | | | V | | | | | | | 1/8/1999 | | | | | 10 | | 70 | | Otsego | 51 | | | F | | |  |
| A/New York/278/1999 | CY001975 | VI | | | | | I | | | | | | | 2/4/1999 | | | | | 14 | | 98 | | Otsego | 64 | | | F | | |  |
| A/New York/279/1999 | CY001759 | I | | | | | III | | | | | | | 2/23/1999 | | | | | 17 | | 119 | | Rensselaer | 91 | | | F | | |  |
| A/New York/280/1999 | CY001767 | I | | | | | III | | | | | | | 4/12/1999 | | | | | 24 | | 168 | | Rensselaer | 81 | | | M | | |  |
| A/New York/282/1999 | CY001775 | I | | | | | III | | | | | | | 2/11/1999 | | | | | 15 | | 105 | | Schoharie | 14 | | | F | | |  |
| A/New York/283/1999 | CY002143 | IV | | | | | V | | | | | | | 2/12/1999 | | | | | 15 | | 105 | | Queens | ? | | | M | | |  |
| A/New York/284/1999 | CY001663 | I | | | | | IV | | | | | | | 3/8/1999 | | | | | 19 | | 133 | | Queens | 96 | | | F | | |  |
| A/New York/285/1999 | CY002151 | I | | | | | III | | | | | | | 1/25/1999 | | | | | 13 | | 91 | | Onondaga | 77 | | | F | | |  |
| A/New York/286/1999 | CY001671 | I | | | | | III | | | | | | | 3/19/1999 | | | | | 20 | | 140 | | Onondaga | 27 | | | M | | |  |
| A/New York/287/1998 | CY001679 | V | | | | | I | | | | | | | 12/29/1998 | | | | | 9 | | 63 | | Schenectady | 55 | | | F | | |  |
| A/New York/288/1999 | CY001783 | I | | | | | III | | | | | | | 2/26/1999 | | | | | 17 | | 119 | | Schenectady | 89 | | | F | | |  |
| A/New York/289/1998 | CY001791 | V | | | | | V | | | | | | | 12/4/1998 | | | | | 5 | | 35 | | Onondaga | 18 | | | M | | |  |
| A/New York/290/1999 | CY001799 | I | | | | | III | | | | | | | 2/17/1999 | | | | | 16 | | 112 | | Onondaga | ? | | | F | | |  |
| A/New York/304/1998 | CY001807 | I | | | | | III | | | | | | | 12/30/1998 | | | | | 9 | | 63 | | Suffolk | 1 m | | | M | | |  |
| A/New York/311/1999 | CY001815 | I | | | | | III | | | | | | | 3/1/1999 | | | | | 18 | | 126 | | Suffolk | 86 | | | M | | |  |
| A/New York/313/1998 | CY001823 | I | | | | | III | | | | | | | 12/28/1998 | | | | | 9 | | 63 | | Albany | 90 | | | F | | |  |
| A/New York/314/1999 | CY001831 | II | | | | | III | | | | | | | 2/3/1999 | | | | | 14 | | 98 | | Albany | 82 | | | F | | |  |
| A/New York/315/1999 | CY001839 | VI | | | | | I | | | | | | | 1/6/1999 | | | | | 10 | | 70 | | Tompkins | 31 | | | M | | |  |
| A/New York/316/1999 | CY002167 | VI | | | | | I | | | | | | | 1/26/1999 | | | | | 13 | | 91 | | Tompkins | 19 | | | F | | |  |
| A/New York/317/1999 | CY001847 | I | | | | | III | | | | | | | 1/4/1999 | | | | | 10 | | 70 | | Kings | 83 | | | ? | | |  |
| A/New York/318/1999 | CY001855 | I | | | | | III | | | | | | | 2/2/1999 | | | | | 14 | | 98 | | Kings | 1 | | | ? | | |  |
| A/New York/320/1999 | CY001863 | I | | | | | III | | | | | | | 3/26/1999 | | | | | 21 | | 147 | | Rensselaer | 73 | | | F | | |  |
| A/New York/321/1999 | CY001871 | I | | | | | III | | | | | | | 1/17/1999 | | | | | 12 | | 84 | | Otsego | 23 | | | M | | |  |
| A/New York/322/1999 | CY002175 | I | | | | | III | | | | | | | 3/18/1999 | | | | | 20 | | 140 | | Otsego | 66 | | | M | | |  |
| A/New York/323/1999 | CY001879 | I | | | | | III | | | | | | | 1/25/1999 | | | | | 13 | | 91 | | Dutchess | 81 | | | M | | |  |
| A/New York/324/1999 | CY001983 | VI | | | | | I | | | | | | | 1/26/1999 | | | | | 13 | | 91 | | Schenectady | 84 | | | F | | |  |
| A/New York/325/1999 | CY002375 | I | | | | | III | | | | | | | 2/26/1999 | | | | | 17 | | 119 | | Schenectady | 86 | | | M | | |  |
| A/New York/327/1999 | CY001887 | I | | | | | I | | | | | | | 3/24/1999 | | | | | 21 | | 147 | | Onondaga | 3 m | | | M | | |  |
| A/New York/328/1998 | CY002383 | I | | | | | III | | | | | | | 12/28/1998 | | | | | 9 | | 63 | | Sullivan | 82 | | | F | | |  |
| A/New York/329/1999 | CY001895 | I | | | | | III | | | | | | | 2/1/1999 | | | | | 14 | | 98 | | Warren | 76 | | | ? | | |  |
| A/New York/330/1998 | CY002391 | I | | | | | III | | | | | | | 12/30/1998 | | | | | 9 | | 63 | | Chemung | 81 | | | F | | |  |
| A/New York/331/1999 | CY001991 | I | | | | | III | | | | | | | 1/28/1999 | | | | | 13 | | 91 | | Chemung | 4 m | | | F | | |  |
| A/New York/332/1999 | CY001999 | I | | | | | II | | | | | | | 2/17/1999 | | | | | 16 | | 112 | | Chemung | ? | | | ? | | |  |
| A/New York/333/1999 | CY001903 | I | | | | | III | | | | | | | 2/16/1999 | | | | | 16 | | 112 | | Saratoga | 87 | | | F | | |  |
| A/New York/335/1999 | CY001911 | VI | | | | | I | | | | | | | 1/20/1999 | | | | | 12 | | 84 | | Broome | 39 | | | M | | |  |
| A/New York/336/1999 | CY001919 | III | | | | | IV | | | | | | | 2/24/1999 | | | | | 17 | | 119 | | Queens | 74 | | | ? | | |  |
| A/New York/337/1999 | CY001927 | I | | | | | IV | | | | | | | 3/8/1999 | | | | | 19 | | 133 | | Queens | 74 | | | ? | | |  |
| A/New York/338/1999 | CY001935 | I | | | | | III | | | | | | | 2/8/1999 | | | | | 15 | | 105 | | Schoharie | 67 | | | F | | |  |
| A/New York/339/1999 | CY002583 | V | | | | | V | | | | | | | 2/9/1999 | | | | | 15 | | 105 | | Onondaga | 4 | | | M | | |  |
| A/New York/340/1999 | CY001943 | I | | | | | III | | | | | | | 1/23/1999 | | | | | 12 | | 84 | | Onondaga | 15 | | | M | | |  |
| A/New York/347/1999 | CY002303 | I | | | | | III | | | | | | | 1/19/1999 | | | | | 12 | | 84 | | Suffolk | 12 | | | F | | |  |
| A/New York/397/1999 | CY006170 | I | | | | | III | | | | | | | 2/4/1999 | | | | | 14 | | 98 | | Onondaga | 3 m | | | M | | |  |
| A/New York/398/1999 | CY002311 | I | | | | | III | | | | | | | 3/24/1999 | | | | | 21 | | 147 | | Onondaga | 50 | | | F | | |  |
| A/New York/448/1998 | CY003567 | V | | | | | V | | | | | | | 11/23/1998 | | | | | 4 | | 28 | | Nassau | 6 m | | | M | | |  |
| A/New York/449/1999 | CY003575 | I | | | | | III | | | | | | | 1/4/1999 | | | | | 10 | | 70 | | Nassau | 8 m | | | F | | |  |
| A/New York/450/1999 | CY003583 | I | | | | | III | | | | | | | 1/8/1999 | | | | | 10 | | 70 | | Nassau | 82 | | | F | | |  |
| A/New York/451/1999 | CY003591 | I | | | | | III | | | | | | | 1/11/1999 | | | | | 11 | | 77 | | Nassau | 1 m | | | F | | |  |
| A/New York/452/1999 | CY006067 | IV | | | | | V | | | | | | | 1/11/1999 | | | | | 11 | | 77 | | New York | 92 | | | F | | |  |
| A/New York/453/1999 | CY003599 | I | | | | | III | | | | | | | 1/12/1999 | | | | | 11 | | 77 | | Nassau | 15 | | | F | | |  |
| A/New York/454/1999 | CY003607 | I | | | | | III | | | | | | | 1/13/1999 | | | | | 11 | | 77 | | Nassau | 66 | | | M | | |  |
| A/New York/455/1999 | CY006075 | VI | | | | | VI | | | | | | | 1/14/1999 | | | | | 11 | | 77 | | Nassau | 1 m | | | M | | |  |
| A/New York/456/1999 | CY003615 | VI | | | | | I | | | | | | | 1/15/1999 | | | | | 11 | | 77 | | New York | 84 | | | M | | |  |
| A/New York/457/1999 | CY003623 | I | | | | | III | | | | | | | 1/15/1999 | | | | | 11 | | 77 | | New York | 82 | | | F | | |  |
| A/New York/458/1999 | CY003631 | VI | | | | | I | | | | | | | 1/22/1999 | | | | | 12 | | 84 | | Nassau | 73 | | | M | | |  |
| A/New York/459/1999 | CY003639 | I | | | | | III | | | | | | | 1/22/1999 | | | | | 13 | | 91 | | Nassau | 1 m | | | M | | |  |
| *1999-2000 Season* |  | | | | | | | | | | | | | | | | | | | | | | | | | | | | |  |
| A/New York/137/1999 | CY001127 | | I | | | | | I | | | | | | | 10/4/1999 | | | | 1 | | 7 | | Albany | 59 | F | | | |  | |
| A/New York/138/1999 | CY000996 | | I | | | | | I | | | | | | | 10/3/1999 | | | | 1 | | 7 | | Albany | 58 | M | | | |  | |
| A/New York/139/1999 | CY001356 | | III | | | | | II | | | | | | | 12/4/1999 | | | | 9 | | 63 | | Essex | 80 | M | | | |  | |
| A/New York/140/1999 | CY002519 | | III | | | | | II | | | | | | | 12/27/1999 | | | | 13 | | 91 | | Broome | 86 | F | | | |  | |
| A/New York/141/1999 | CY000808 | | III | | | | | III | | | | | | | 11/9/1999 | | | | 6 | | 42 | | Albany | 21 | F | | | |  | |
| A/New York/142/2000 | CY001527 | | III | | | | | II | | | | | | | 2/6/2000 | | | | 19 | | 133 | | Albany | 20 | F | | | |  | |
| A/New York/143/1999 | CY000640 | | III | | | | | II | | | | | | | 11/26/1999 | | | | 8 | | 56 | | New York | 22 | M | | | |  | |
| A/New York/145/1999 | CY001388 | | I | | | | | I | | | | | | | 11/9/1999 | | | | 6 | | 42 | | Onondaga | 21 | M | | | |  | |
| A/New York/147/1999 | CY000600 | | III | | | | | II | | | | | | | 11/23/1999 | | | | 8 | | 56 | | Tompkins | 21 | F | | | |  | |
| A/New York/148/2000 | CY000824 | | III | | | | | II | | | | | | | 2/9/2000 | | | | 19 | | 133 | | Tompkins | 12 | M | | | |  | |
| A/New York/149/1999 | CY000464 | | III | | | | | II | | | | | | | 11/29/1999 | | | | 9 | | 63 | | Schoharie | 65 | M | | | |  | |
| A/New York/150/2000 | CY000472 | | III | | | | | II | | | | | | | 1/28/2000 | | | | 18 | | 126 | | Schoharie | 72 | F | | | |  | |
| A/New York/151/1999 | CY000608 | | III | | | | | II | | | | | | | 12/4/1999 | | | | 9 | | 63 | | Essex | 97 | F | | | |  | |
| A/New York/152/2000 | CY001143 | | III | | | | | II | | | | | | | 1/18/2000 | | | | 17 | | 119 | | Essex | 51 | M | | | |  | |
| A/New York/154/2000 | CY000616 | | III | | | | | II | | | | | | | 1/24/2000 | | | | 18 | | 126 | | Otsego | 53 | F | | | |  | |
| A/New York/155/1999 | CY001452 | | III | | | | | II | | | | | | | 12/7/1999 | | | | 10 | | 70 | | Monroe | 29 | F | | | |  | |
| A/New York/156/2000 | CY001404 | | III | | | | | II | | | | | | | 1/5/2000 | | | | 14 | | 98 | | Monroe | 41 | M | | | |  | |
| A/New York/157/1999 | CY000832 | | III | | | | | II | | | | | | | 12/15/1999 | | | | 11 | | 77 | | Suffolk | 6 m | F | | | |  | |
| A/New York/158/2000 | CY000840 | | III | | | | | II | | | | | | | 1/17/2000 | | | | 17 | | 119 | | Suffolk | 89 | M | | | |  | |
| A/New York/160/2000 | CY000988 | | III | | | | | II | | | | | | | 1/3/2000 | | | | 14 | | 98 | | Chemung | 73 | M | | | |  | |
| A/New York/161/1999 | CY000624 | | III | | | | | II | | | | | | | 12/16/1999 | | | | 11 | | 77 | | Chenango | 79 | F | | | |  | |
| A/New York/162/2000 | CY001252 | | III | | | | | II | | | | | | | 2/9/2000 | | | | 19 | | 133 | | Chenango | 53 | F | | | |  | |
| A/New York/163/1999 | CY000648 | | III | | | | | II | | | | | | | 12/22/1999 | | | | 12 | | 84 | | New York | 43 | M | | | |  | |
| A/New York/164/1999 | CY001276 | | III | | | | | II | | | | | | | 12/27/1999 | | | | 13 | | 91 | | Schenectady | 67 | M | | | |  | |
| A/New York/165/2000 | CY001004 | | III | | | | | II | | | | | | | 1/18/2000 | | | | 17 | | 119 | | Schenectady | 96 | M | | | |  | |
| A/New York/166/1999 | CY000816 | | III | | | | | II | | | | | | | 12/24/1999 | | | | 12 | | 84 | | New York | 39 | F | | | |  | |
| A/New York/167/1999 | CY000656 | | III | | | | | II | | | | | | | 12/30/1999 | | | | 13 | | 91 | | Putnum | 67 | M | | | |  | |
| A/New York/168/2000 | CY000848 | | III | | | | | II | | | | | | | 1/30/2000 | | | | 18 | | 126 | | Rensselaer | 58 | F | | | |  | |
| A/New York/169/2000 | CY000664 | | III | | | | | II | | | | | | | 1/3/2000 | | | | 14 | | 98 | | Rensselaer | 85 | M | | | |  | |
| A/New York/170/2000 | CY000672 | | III | | | | | II | | | | | | | 1/5/2000 | | | | 14 | | 98 | | Fulton | 23 | F | | | |  | |
| A/New York/171/1999 | CY000680 | | III | | | | | II | | | | | | | 12/30/1999 | | | | 13 | | 91 | | Jefferson | 8 m | F | | | |  | |
| A/New York/172/1999 | CY000688 | | III | | | | | II | | | | | | | 12/26/1999 | | | | 13 | | 91 | | Columbia | 79 | M | | | |  | |
| A/New York/173/2000 | CY000696 | | III | | | | | II | | | | | | | 2/2/2000 | | | | 18 | | 126 | | Columbia | 91 | M | | | |  | |
| A/New York/174/2000 | CY000704 | | III | | | | | II | | | | | | | 1/4/2000 | | | | 14 | | 98 | | Herkimer | 36 | F | | | |  | |
| A/New York/175/2000 | CY000712 | | III | | | | | II | | | | | | | 1/6/2000 | | | | 14 | | 98 | | Herkimer | 73 | F | | | |  | |
| A/New York/176/2000 | CY000720 | | III | | | | | II | | | | | | | 3/1/2000 | | | | 22 | | 154 | | Cattaragus | 80 | F | | | |  | |
| A/New York/177/1999 | CY000728 | | I | | | | | II | | | | | | | 10/25/1999 | | | | 4 | | 28 | | Broome | 27 | F | | | |  | |
| A/New York/178/2000 | CY000856 | | III | | | | | II | | | | | | | 2/29/2000 | | | | 22 | | 154 | | Onondaga | 71 | M | | | |  | |
| A/New York/179/1999 | CY000736 | | III | | | | | II | | | | | | | 11/24/1999 | | | | 8 | | 56 | | Albany | 31 | M | | | |  | |
| A/New York/180/2000 | CY000744 | | III | | | | | II | | | | | | | 2/9/2000 | | | | 19 | | 133 | | Saratoga | 81 | F | | | |  | |
| A/New York/181/1999 | CY001183 | | III | | | | | II | | | | | | | 12/5/1999 | | | | 10 | | 70 | | Albany | 32 | F | | | |  | |
| A/New York/182/2000 | CY001284 | | III | | | | | II | | | | | | | 2/18/2000 | | | | 20 | | 140 | | Onondaga | 61 | M | | | |  | |
| A/New York/183/1999 | CY001364 | | III | | | | | II | | | | | | | 12/1/1999 | | | | 9 | | 63 | | Albany | 27 | F | | | |  | |
| A/New York/184/1999 | CY001460 | | III | | | | | II | | | | | | | 12/20/1999 | | | | 12 | | 84 | | Chemung | 34 | F | | | |  | |
| A/New York/185/1999 | CY000752 | | III | | | | | II | | | | | | | 12/25/1999 | | | | 12 | | 84 | | Albany | 60 | M | | | |  | |
| A/New York/186/1999 | CY000864 | | III | | | | | II | | | | | | | 12/24/1999 | | | | 12 | | 84 | | Suffolk | 50 | F | | | |  | |
| A/New York/187/2000 | CY001372 | | III | | | | | II | | | | | | | 1/27/2000 | | | | 18 | | 126 | | Onondaga | 28 | F | | | |  | |
| A/New York/188/1999 | CY001535 | | III | | | | | II | | | | | | | 12/13/1999 | | | | 11 | | 77 | | Onondaga | 21 | F | | | |  | |
| A/New York/189/1999 | CY001012 | | III | | | | | II | | | | | | | 12/20/1999 | | | | 12 | | 84 | | Otsego | 33 | F | | | |  | |
| A/New York/421/1999 | CY003439 | | III | | | | | II | | | | | | | 12/31/1999 | | | | 13 | | 91 | | Nassau | 1 m | M | | | |  | |
| A/New York/422/1999 | CY003792 | | III | | | | | II | | | | | | | 12/15/1999 | | | | 11 | | 77 | | Suffolk | 1 m | M | | | |  | |
| A/New York/423/1999 | CY003800 | | I | | | | | I | | | | | | | 12/16/1999 | | | | 11 | | 77 | | Nassau | 16 | M | | | |  | |
| A/New York/424/1999 | CY003223 | | III | | | | | II | | | | | | | 12/16/1999 | | | | 11 | | 77 | | Nassau | 1 | F | | | |  | |
| A/New York/425/1999 | CY003447 | | III | | | | | II | | | | | | | 12/17/1999 | | | | 11 | | 77 | | Nassau | 5 m | M | | | |  | |
| A/New York/426/1999 | CY003231 | | III | | | | | II | | | | | | | 12/20/1999 | | | | 12 | | 84 | | Nassau | 4 m | M | | | |  | |
| A/New York/427/1999 | CY003239 | | III | | | | | II | | | | | | | 12/27/1999 | | | | 13 | | 91 | | Nassau | 64 | F | | | |  | |
| A/New York/428/1999 | CY003808 | | II | | | | | IV | | | | | | | 9/28/1999 | | | | 0 | | 0 | | Nassau | 1 m | M | | | |  | |
| A/New York/429/2000 | CY003816 | | III | | | | | II | | | | | | | 1/3/2000 | | | | 14 | | 98 | | Nassau | 7 m | F | | | |  | |
| A/New York/430/2000 | CY003455 | | III | | | | | II | | | | | | | 1/3/2000 | | | | 14 | | 98 | | Nassau | 2 m | M | | | |  | |
| A/New York/431/2000 | CY003247 | | III | | | | | II | | | | | | | 1/3/2000 | | | | 14 | | 98 | | Nassau | 2 m | M | | | |  | |
| A/New York/432/2000 | CY003824 | | III | | | | | II | | | | | | | 1/5/2000 | | | | 14 | | 98 | | Nassau | 5 m | M | | | |  | |
| A/New York/433/2000 | CY003255 | | III | | | | | II | | | | | | | 1/5/2000 | | | | 14 | | 98 | | Nassau | 74 | F | | | |  | |
| A/New York/434/2000 | CY003263 | | III | | | | | II | | | | | | | 1/9/2000 | | | | 14 | | 98 | | Nassau | 82 | M | | | |  | |
| A/New York/436/2000 | CY003271 | | III | | | | | II | | | | | | | 1/10/2000 | | | | 14 | | 98 | | Nassau | 3 | F | | | |  | |
| A/New York/437/2000 | CY003279 | | III | | | | | II | | | | | | | 1/12/2000 | | | | 14 | | 98 | | Nassau | 1 m | F | | | |  | |
| A/New York/438/2000 | CY003287 | | III | | | | | II | | | | | | | 1/18/2000 | | | | 17 | | 119 | | Nassau | 5 | M | | | |  | |
| A/New York/439/2000 | CY003463 | | III | | | | | II | | | | | | | 1/25/2000 | | | | 18 | | 126 | | Nassau | 63 | M | | | |  | |
| A/New York/440/2000 | CY003832 | | III | | | | | II | | | | | | | 1/24/2000 | | | | 18 | | 126 | | Nassau | 87 | F | | | |  | |
| *2001-2002 Season* |  | | | | | | | | | | | | | | | | | | | | | | | | | | | | |  |
| A/New York/100/2002 | CY000232 | | | I | | | | | I | | | | | | | 1/22/2002 | | | | 10 | | 70 | Madison | 21 | F | | | |  | |
| A/New York/101/2002 | CY001111 | | | I | | | | | I | | | | | | | 2/4/2002 | | | | 12 | | 84 | Madison | 19 | F | | | |  | |
| A/New York/102/2002 | CY001324 | | | I | | | | | I | | | | | | | 1/23/2002 | | | | 10 | | 70 | Queens | 18 | M | | | |  | |
| A/New York/103/2002 | CY000424 | | | I | | | | | I | | | | | | | 1/25/2002 | | | | 10 | | 70 | Rensselaer | 19 | M | | | |  | |
| A/New York/104/2002 | CY001191 | | | I | | | | | II | | | | | | | 1/17/2002 | | | | 9 | | 63 | Tompkins | 18 | M | | | |  | |
| A/New York/105/2002 | CY001135 | | | I | | | | | II | | | | | | | 2/5/2002 | | | | 12 | | 84 | Tompkins | 38 | F | | | |  | |
| A/New York/106/2002 | CY000496 | | | I | | | | | II | | | | | | | 1/20/2002 | | | | 10 | | 70 | Monroe | 15 | F | | | |  | |
| A/New York/107/2002 | CY001151 | | | I | | | | | II | | | | | | | 1/16/2002 | | | | 9 | | 63 | Broome | 41 | M | | | |  | |
| A/New York/108/2002 | CY000504 | | | I | | | | | II | | | | | | | 1/31/2002 | | | | 11 | | 77 | Broome | 88 | M | | | |  | |
| A/New York/109/2002 | CY000536 | | | I | | | | | II | | | | | | | 1/30/2002 | | | | 11 | | 77 | Cortland | 22 | M | | | |  | |
| A/New York/110/2002 | CY000120 | | | I | | | | | I | | | | | | | 1/29/2002 | | | | 11 | | 77 | Columbia | 24 | M | | | |  | |
| A/New York/111/2002 | CY000940 | | | I | | | | | II | | | | | | | 2/4/2002 | | | | 12 | | 84 | Columbia | 78 | M | | | |  | |
| A/New York/112/2002 | CY001332 | | | I | | | | | II | | | | | | | 1/29/2002 | | | | 11 | | 77 | Yates | 2 | F | | | |  | |
| A/New York/113/2002 | CY000240 | | | I | | | | | II | | | | | | | 1/31/2002 | | | | 11 | | 77 | St. Lawrence | 11 | F | | | |  | |
| A/New York/114/2002 | CY000544 | | | I | | | | | I | | | | | | | 3/5/2002 | | | | 16 | | 112 | St. Lawrence | 54 | F | | | |  | |
| A/New York/115/2002 | CY000552 | | | I | | | | | II | | | | | | | 2/7/2002 | | | | 12 | | 84 | Queens | 1 m | F | | | |  | |
| A/New York/116/2002 | CY000560 | | | I | | | | | I | | | | | | | 1/30/2002 | | | | 11 | | 77 | Livingston | 72 | M | | | |  | |
| A/New York/117/2002 | CY000800 | | | I | | | | | I | | | | | | | 2/1/2002 | | | | 11 | | 77 | Ontario | 72 | M | | | |  | |
| A/New York/118/2002 | CY001340 | | | I | | | | | I | | | | | | | 1/30/2002 | | | | 11 | | 77 | Saratoga | 43 | M | | | |  | |
| A/New York/119/2002 | CY000948 | | | I | | | | | II | | | | | | | 1/29/2002 | | | | 11 | | 77 | Chenango | 88 | M | | | |  | |
| A/New York/120/2002 | CY000632 | | | I | | | | | II | | | | | | | 2/19/2002 | | | | 14 | | 98 | Albany | 92 | F | | | |  | |
| A/New York/121/2002 | CY000248 | | | I | | | | | II | | | | | | | 2/26/2002 | | | | 15 | | 105 | Montgomery | 81 | M | | | |  | |
| A/New York/122/2002 | CY001204 | | | I | | | | | I | | | | | | | 3/21/2002 | | | | 18 | | 126 | Oswego | 1 | M | | | |  | |
| A/New York/124/2001 | CY000312 | | | I | | | | | II | | | | | | | 11/27/2001 | | | | 2 | | 14 | Onondaga | 20 | F | | | |  | |
| A/New York/125/2002 | CY001444 | | | I | | | | | II | | | | | | | 1/14/2002 | | | | 9 | | 63 | Essex | 35 | M | | | |  | |
| A/New York/126/2002 | CY001951 | | | I | | | | | I | | | | | | | 3/1/2002 | | | | 15 | | 105 | Onondaga | 2 | F | | | |  | |
| A/New York/127/2001 | CY000583 | | | I | | | | | II | | | | | | | 12/31/2001 | | | | 7 | | 49 | Albany | 83 | M | | | |  | |
| A/New York/128/2002 | CY000432 | | | I | | | | | I | | | | | | | 1/25/2002 | | | | 10 | | 70 | Suffolk | 19 d | M | | | |  | |
| A/New York/129/2002 | CY000320 | | | I | | | | | II | | | | | | | 2/12/2002 | | | | 13 | | 91 | St. Lawrence | 38 | F | | | |  | |
| A/New York/130/2002 | CY000592 | | | I | | | | | II | | | | | | | 3/11/2002 | | | | 17 | | 119 | Onondaga | 4 | M | | | |  | |
| A/New York/131/2001 | CY000328 | | | I | | | | | II | | | | | | | 12/23/2001 | | | | 6 | | 42 | Suffolk | 1 m | ? | | | |  | |
| A/New York/132/2002 | CY000440 | | | I | | | | | II | | | | | | | 1/27/2002 | | | | 11 | | 77 | Suffolk | 1 m | M | | | |  | |
| A/New York/133/2002 | CY000336 | | | I | | | | | II | | | | | | | 2/6/2002 | | | | 12 | | 84 | Suffolk | 1 m | M | | | |  | |
| A/New York/134/2002 | CY000448 | | | I | | | | | II | | | | | | | 1/4/2002 | | | | 7 | | 49 | Onondaga | 1 | F | | | |  | |
| A/New York/135/2002 | CY000344 | | | I | | | | | II | | | | | | | 2/14/2002 | | | | 13 | | 91 | Onondaga | 13 | M | | | |  | |
| A/New York/136/2002 | CY001244 | | | I | | | | | II | | | | | | | 3/19/2002 | | | | 18 | | 126 | Onondaga | 5 | F | | | |  | |
| A/New York/273/2001 | CY001727 | | | I | | | | | II | | | | | | | 12/23/2001 | | | | 6 | | 42 | Suffolk | 1 m | ? | | | |  | |
| A/New York/274/2002 | CY001735 | | | I | | | | | I | | | | | | | 2/26/2002 | | | | 15 | | 105 | Suffolk | 49 | F | | | |  | |
| A/New York/275/2002 | CY002135 | | | I | | | | | II | | | | | | | 1/4/2002 | | | | 7 | | 49 | Onondaga | 22 | F | | | |  | |
| A/New York/276/2002 | CY001743 | | | I | | | | | II | | | | | | | 3/7/2002 | | | | 16 | | 112 | Onondaga | 51 | F | | | |  | |
| A/New York/401/2001 | CY003087 | | | I | | | | | I | | | | | | | 11/21/2001 | | | | 1 | | 7 | Nassau | 1 | F | | | |  | |
| A/New York/402/2002 | CY003095 | | | I | | | | | I | | | | | | | 2/27/2002 | | | | 6 | | 42 | Nassau | 7 m | M | | | |  | |
| A/New York/403/2002 | CY003103 | | | I | | | | | II | | | | | | | 1/4/2002 | | | | 7 | | 49 | Nassau | 3 | F | | | |  | |
| A/New York/404/2002 | CY003111 | | | I | | | | | I | | | | | | | 1/5/2002 | | | | 7 | | 49 | Nassau | 7 m | F | | | |  | |
| A/New York/405/2002 | CY003119 | | | I | | | | | II | | | | | | | 1/7/2002 | | | | 8 | | 56 | Nassau | 80 | M | | | |  | |
| A/New York/406/2002 | CY003132 | | | I | | | | | I | | | | | | | 1/8/2002 | | | | 8 | | 56 | Nassau | 2 | F | | | |  | |
| A/New York/407/2002 | CY003431 | | | I | | | | | II | | | | | | | 1/8/2002 | | | | 8 | | 56 | Nassau | 2 m | M | | | |  | |
| A/New York/408/2002 | CY003135 | | | I | | | | | II | | | | | | | 1/11/2002 | | | | 8 | | 56 | Nassau | 3 m | F | | | |  | |
| A/New York/409/2002 | CY003143 | | | I | | | | | I | | | | | | | 1/14/2002 | | | | 9 | | 63 | Suffolk | 4 | M | | | |  | |
| A/New York/410/2002 | CY003151 | | | I | | | | | II | | | | | | | 1/15/2002 | | | | 9 | | 63 | Nassau | 76 | F | | | |  | |
| A/New York/411/2002 | CY003159 | | | I | | | | | II | | | | | | | 1/22/2002 | | | | 10 | | 70 | Nassau | 7 m | M | | | |  | |
| A/New York/412/2002 | CY003167 | | | I | | | | | I | | | | | | | 2/1/2002 | | | | 11 | | 77 | Nassau | 1 m | M | | | |  | |
| A/New York/413/2002 | CY003175 | | | I | | | | | II | | | | | | | 2/8/2002 | | | | 12 | | 84 | Nassau | 87 | M | | | |  | |
| A/New York/414/2002 | CY003183 | | | I | | | | | I | | | | | | | 2/12/2002 | | | | 13 | | 91 | Nassau | 61 | M | | | |  | |
| A/New York/415/2002 | CY003191 | | | I | | | | | II | | | | | | | 2/22/2002 | | | | 14 | | 98 | Nassau | 29 | F | | | |  | |
| A/New York/416/2002 | CY003199 | | | I | | | | | I | | | | | | | 2/28/2002 | | | | 15 | | 105 | Nassau | 1 | F | | | |  | |
| A/New York/418/2002 | CY003207 | | | I | | | | | II | | | | | | | 1/16/2002 | | | | 9 | | 63 | Nassau | 94 | F | | | |  | |
| A/New York/419/2002 | CY003215 | | | I | | | | | II | | | | | | | 1/18/2002 | | | | 9 | | 63 | Nassau | 1 m | M | | | |  | |
| A/New York/420/2002 | CY003784 | | | I | | | | | I | | | | | | | 1/28/2002 | | | | 11 | | 77 | Nassau | 2 m | M | | | |  | |
| A/New York/71/2001 | CY000488 | | | I | | | | | II | | | | | | | 11/21/2001 | | | | 1 | | 7 | New York | 19 | M | | | |  | |
| A/New York/74/2002 | CY001159 | | | I | | | | | II | | | | | | | 1/19/2002 | | | | 9 | | 63 | Wayne | 6 | F | | | |  | |
| A/New York/75/2002 | CY001308 | | | I | | | | | I | | | | | | | 2/12/2002 | | | | 13 | | 91 | Wayne | 61 | F | | | |  | |
| A/New York/76/2002 | CY001436 | | | I | | | | | I | | | | | | | 1/11/2002 | | | | 8 | | 56 | New York | 42 | M | | | |  | |
| A/New York/77/2001 | CY002335 | | | I | | | | | II | | | | | | | 12/26/2001 | | | | 6 | | 42 | Albany | 20 | F | | | |  | |
| A/New York/80/2001 | CY000576 | | | I | | | | | I | | | | | | | 12/26/2001 | | | | 6 | | 42 | Rockland | 55 | M | | | |  | |
| A/New York/81/2002 | CY001268 | | | I | | | | | II | | | | | | | 2/19/2002 | | | | 14 | | 98 | Rockland | 30 | F | | | |  | |
| A/New York/82/2001 | CY000280 | | | I | | | | | II | | | | | | | 12/26/2001 | | | | 6 | | 42 | Schoharie | 29 | M | | | |  | |
| A/New York/83/2001 | CY000192 | | | I | | | | | II | | | | | | | 12/15/2001 | | | | 4 | | 28 | Clinton | 16 | M | | | |  | |
| A/New York/84/2001 | CY000208 | | | I | | | | | I | | | | | | | 12/29/2001 | | | | 6 | | 42 | Delaware | 28 | M | | | |  | |
| A/New York/85/2001 | CY000392 | | | I | | | | | I | | | | | | | 12/15/2001 | | | | 7 | | 49 | Onondaga | 23 | F | | | |  | |
| A/New York/86/2002 | CY000288 | | | I | | | | | I | | | | | | | 3/1/2002 | | | | 15 | | 105 | Onondaga | 5 m | M | | | |  | |
| A/New York/87/2002 | CY000400 | | | I | | | | | II | | | | | | | 1/8/2002 | | | | 8 | | 56 | Dutchess | 45 | F | | | |  | |
| A/New York/88/2002 | CY001079 | | | I | | | | | II | | | | | | | 2/26/2002 | | | | 15 | | 105 | Dutchess | 50 | F | | | |  | |
| A/New York/89/2002 | CY000408 | | | I | | | | | I | | | | | | | 1/12/2002 | | | | 8 | | 56 | Westchester | 7 m | F | | | |  | |
| A/New York/90/2002 | CY000416 | | | I | | | | | I | | | | | | | 2/6/2002 | | | | 12 | | 84 | Westchester | 47 | F | | | |  | |
| A/New York/91/2002 | CY000216 | | | I | | | | | II | | | | | | | 1/17/2002 | | | | 9 | | 63 | Rensselaer | 21 | F | | | |  | |
| A/New York/92/2002 | CY000296 | | | I | | | | | I | | | | | | | 1/18/2002 | | | | 9 | | 63 | Chemung | 38 | M | | | |  | |
| A/New York/93/2002 | CY000932 | | | I | | | | | I | | | | | | | 2/19/2002 | | | | 14 | | 98 | Chemung | 83 | M | | | |  | |
| A/New York/94/2001 | CY001175 | | | I | | | | | II | | | | | | | 12/25/2001 | | | | 6 | | 42 | Suffolk | 38 | ? | | | |  | |
| A/New York/95/2002 | CY000224 | | | I | | | | | I | | | | | | | 2/26/2002 | | | | 15 | | 105 | Suffolk | 5 m | F | | | |  | |
| A/New York/96/2002 | CY000304 | | | II | | | | | III | | | | | | | 1/18/2002 | | | | 9 | | 63 | Schenectady | 4 m | M | | | |  | |
| A/New York/97/2002 | CY001316 | | | I | | | | | II | | | | | | | 2/13/2002 | | | | 13 | | 91 | Schenectady | 81 | F | | | |  | |
| A/New York/99/2002 | CY001087 | | | I | | | | | II | | | | | | | 1/23/2002 | | | | 10 | | 70 | Otsego | 18 | M | | | |  | |
| *2002-2003 Season* |  | | | | | | | | | | | | | | | | | | | | | | | | | | | | |  |
| A/New York/192/2003 | CY000760 | | | II | | | | | II | | | | | | | 2/4/2003 | | | | 3 | | 21 | Suffolk | 3m | M | | | | |  |
| A/New York/193/2003 | CY000872 | | | IV | | | | | IV | | | | | | | 2/19/2003 | | | | 6 | | 28 | Tompkins | 23 | F | | | | |  |
| A/New York/194/2003 | CY000880 | | | IV | | | | | IV | | | | | | | 2/5/2003 | | | | 3 | | 21 | Rensselaer | 41 | M | | | | |  |
| A/New York/195/2003 | CY001468 | | | IV | | | | | IV | | | | | | | 2/18/2003 | | | | 5 | | 35 | Schoharie | 81 | M | | | | |  |
| A/New York/196/2003 | CY001543 | | | V | | | | | V | | | | | | | 2/19/2003 | | | | 6 | | 42 | Onondaga | 57 | M | | | | |  |
| A/New York/197/2003 | CY001551 | | | IV | | | | | IV | | | | | | | 3/14/2003 | | | | 9 | | 63 | Warren | 5 | F | | | | |  |
| A/New York/198/2003 | CY001020 | | | V | | | | | V | | | | | | | 3/8/2003 | | | | 8 | | 56 | Broome | 24 | F | | | | |  |
| A/New York/199/2003 | CY001260 | | | IV | | | | | IV | | | | | | | 3/21/2003 | | | | 10 | | 70 | Suffolk | 1 | M | | | | |  |
| A/New York/201/2003 | CY001380 | | | V | | | | | V | | | | | | | 4/10/2003 | | | | 13 | | 91 | Suffolk | 37 | ? | | | | |  |
| A/New York/202/2003 | CY001167 | | | I | | | | | I | | | | | | | 4/5/2003 | | | | 12 | | 84 | Onondaga | 3m | M | | | | |  |
| A/New York/203/2003 | CY001476 | | | V | | | | | V | | | | | | | 5/7/2003 | | | | 17 | | 119 | New York | 4m | ? | | | | |  |
| A/New York/213/2003 | CY001412 | | | III | | | | | III | | | | | | | 4/22/2003 | | | | 15 | | 105 | Washington | 91 | ? | | | | |  |
| A/New York/215/2003 | CY001559 | | | III | | | | | III | | | | | | | 4/22/2003 | | | | 15 | | 105 | Washington | 87 | ? | | | | |  |
| A/New York/216/2003 | CY001567 | | | III | | | | | III | | | | | | | 4/22/2003 | | | | 15 | | 105 | Washington | 83 | F | | | | |  |
| A/New York/485/2003 | CY003687 | | | V | | | | | V | | | | | | | 1/20/2003 | | | | 1 | | 7 | Nassau | 2 | M | | | | |  |
| *2003-2004 Season* |  | | | | | | | | | | | | | | | | | | | | | | | | | | | | |  |
| A/New York/1/2003 | CY001028 | | | | I | | | | | II | | | | | | 10/28/2003 | | | | 1 | | 7 | Tompkins | 21 | M | | | | |  |
| A/New York/10/2004 | CY000768 | | | | I | | | | | II | | | | | | 1/30/2004 | | | | 14 | | 98 | Richmond | 92 | F | | | | |  |
| A/New York/11/2003 | CY000519 | | | | I | | | | | III | | | | | | 10/31/2003 | | | | 1 | | 7 | Suffolk | 8 | M | | | | |  |
| A/New York/12/2003 | CY000128 | | | | I | | | | | III | | | | | | 12/13/2003 | | | | 7 | | 49 | Suffolk | 20 | M | | | | |  |
| A/New York/13/2003 | CY000908 | | | | I | | | | | II | | | | | | 11/12/2003 | | | | 3 | | 21 | Erie | 23 | F | | | | |  |
| A/New York/14/2003 | CY000916 | | | | I | | | | | III | | | | | | 12/3/2003 | | | | 6 | | 42 | Erie | 21 | F | | | | |  |
| A/New York/15/2003 | CY000352 | | | | I | | | | | III | | | | | | 11/12/2003 | | | | 3 | | 21 | Schoharie | 15 | M | | | | |  |
| A/New York/16/2003 | CY000136 | | | | I | | | | | III | | | | | | 11/11/2003 | | | | 3 | | 21 | Madison | 22 | M | | | | |  |
| A/New York/17/2003 | CY001060 | | | | I | | | | | II | | | | | | 11/16/2003 | | | | 4 | | 28 | Queens | 18 | F | | | | |  |
| A/New York/18/2003 | CY001196 | | | | I | | | | | II | | | | | | 12/1/2003 | | | | 6 | | 42 | Saratoga | 20 | F | | | | |  |
| A/New York/19/2003 | CY000255 | | | | I | | | | | II | | | | | | 12/18/2003 | | | | 8 | | 56 | Saratoga | 20 | F | | | | |  |
| A/New York/2/2003 | CY000480 | | | | I | | | | | IV | | | | | | 10/27/2003 | | | | 1 | | 7 | Kings | 1 | F | | | | |  |
| A/New York/20/2003 | CY001428 | | | | I | | | | | II | | | | | | 12/1/2003 | | | | 6 | | 42 | Broome | 19 | M | | | | |  |
| A/New York/21/2003 | CY000360 | | | | I | | | | | III | | | | | | 11/26/2003 | | | | 5 | | 35 | Tompkins | 20 | F | | | | |  |
| A/New York/22/2003 | CY000368 | | | | I | | | | | III | | | | | | 12/2/2003 | | | | 6 | | 42 | Dutchess | 43 | M | | | | |  |
| A/New York/23/2003 | CY000200 | | | | I | | | | | II | | | | | | 12/16/2003 | | | | 8 | | 56 | Dutchess | 71 | F | | | | |  |
| A/New York/24/2003 | CY001095 | | | | I | | | | | III | | | | | | 10/27/2003 | | | | 6 | | 42 | Clinton | 9 | M | | | | |  |
| A/New York/25/2003 | CY000776 | | | | I | | | | | III | | | | | | 12/26/2003 | | | | 9 | | 63 | Clinton | 31 | F | | | | |  |
| A/New York/26/2003 | CY000144 | | | | I | | | | | III | | | | | | 12/2/2003 | | | | 6 | | 42 | Essex | 17 | F | | | | |  |
| A/New York/267/2003 | CY001631 | | | | I | | | | | II | | | | | | 11/28/2003 | | | | 5 | | 35 | Monroe | 3 | M | | | | |  |
| A/New York/268/2003 | CY001639 | | | | I | | | | | III | | | | | | 11/27/2003 | | | | 5 | | 35 | Monroe | 32 | F | | | | |  |
| A/New York/269/2003 | CY001647 | | | | II | | | | | V | | | | | | 11/28/2003 | | | | 5 | | 35 | Monroe | 78 | F | | | | |  |
| A/New York/27/2003 | CY001119 | | | | I | | | | | III | | | | | | 10/28/2003 | | | | 1 | | 7 | Essex | 1 | F | | | | |  |
| A/New York/270/2003 | CY001655 | | | | I | | | | | II | | | | | | 11/18/2003 | | | | 4 | | 28 | Monroe | 34 | F | | | | |  |
| A/New York/271/2003 | CY001719 | | | | I | | | | | II | | | | | | 11/28/2003 | | | | 5 | | 35 | Monroe | 6 | F | | | | |  |
| A/New York/272/2003 | CY002351 | | | | I | | | | | II | | | | | | 11/28/2003 | | | | 5 | | 35 | Monroe | 4 | F | | | | |  |
| A/New York/28/2003 | CY000016 | | | | I | | | | | II | | | | | | 11/19/2003 | | | | 4 | | 28 | Onondaga | 3 | F | | | | |  |
| A/New York/29/2003 | CY000528 | | | | I | | | | | III | | | | | | 12/12/2003 | | | | 7 | | 49 | Onondaga | 19 | F | | | | |  |
| A/New York/3/2003 | CY000888 | | | | I | | | | | IV | | | | | | 12/10/2003 | | | | 7 | | 49 | Delaware | 18 | F | | | | |  |
| A/New York/30/2003 | CY000024 | | | | I | | | | | IV | | | | | | 12/2/2003 | | | | 6 | | 42 | Albany | 52 | F | | | | |  |
| A/New York/31/2004 | CY000376 | | | | I | | | | | III | | | | | | 1/5/2004 | | | | 11 | | 77 | Albany | 66 | M | | | | |  |
| A/New York/32/2003 | CY000032 | | | | II | | | | | V | | | | | | 11/29/2003 | | | | 5 | | 35 | Monroe | 91 | F | | | | |  |
| A/New York/33/2004 | CY000040 | | | | I | | | | | II | | | | | | 1/9/2004 | | | | 11 | | 77 | Monroe | 1 | M | | | | |  |
| A/New York/34/2003 | CY000048 | | | | I | | | | | III | | | | | | 12/3/2003 | | | | 6 | | 42 | Ulster | 24 | F | | | | |  |
| A/New York/35/2003 | CY000056 | | | | I | | | | | II | | | | | | 12/4/2003 | | | | 6 | | 42 | Cortland | 21 | M | | | | |  |
| A/New York/36/2003 | CY000064 | | | | I | | | | | II | | | | | | 12/10/2003 | | | | 7 | | 49 | Cortland | 18 | F | | | | |  |
| A/New York/37/2003 | CY001300 | | | | I | | | | | II | | | | | | 12/4/2003 | | | | 6 | | 42 | Rensselaer | 35 | F | | | | |  |
| A/New York/38/2003 | CY000784 | | | | I | | | | | III | | | | | | 12/21/2003 | | | | 9 | | 63 | Rensselaer | 89 | F | | | | |  |
| A/New York/39/2003 | CY001103 | | | | I | | | | | III | | | | | | 12/4/2003 | | | | 6 | | 42 | Madison | 18 | F | | | | |  |
| A/New York/4/2003 | CY000512 | | | | I | | | | | IV | | | | | | 12/8/2003 | | | | 7 | | 49 | New York | ? | ? | | | | |  |
| A/New York/40/2003 | CY000152 | | | | I | | | | | II | | | | | | 12/4/2003 | | | | 6 | | 42 | Ontario | 21 | F | | | | |  |
| A/New York/41/2003 | CY000160 | | | | I | | | | | II | | | | | | 12/8/2003 | | | | 7 | | 49 | Ontario | 19 | M | | | | |  |
| A/New York/42/2003 | CY000168 | | | | I | | | | | II | | | | | | 12/8/2003 | | | | 7 | | 49 | Chautauqua | 22 | F | | | | |  |
| A/New York/43/2003 | CY000176 | | | | I | | | | | II | | | | | | 12/10/2003 | | | | 7 | | 49 | Chautauqua | 11 | M | | | | |  |
| A/New York/44/2003 | CY000184 | | | | I | | | | | III | | | | | | 12/8/2003 | | | | 7 | | 49 | St. Lawrence | 9 | M | | | | |  |
| A/New York/45/2003 | CY000072 | | | | I | | | | | II | | | | | | 12/9/2003 | | | | 7 | | 49 | Greene | 16 | F | | | | |  |
| A/New York/46/2003 | CY000792 | | | | I | | | | | III | | | | | | 12/9/2003 | | | | 7 | | 49 | Schenectady | 7 | M | | | | |  |
| A/New York/47/2003 | CY000080 | | | | I | | | | | III | | | | | | 12/12/2003 | | | | 7 | | 49 | Schenectady | 33 | M | | | | |  |
| A/New York/48/2003 | CY000088 | | | | I | | | | | IV | | | | | | 12/9/2003 | | | | 7 | | 49 | Allegany | 3 | M | | | | |  |
| A/New York/49/2003 | CY000384 | | | | I | | | | | III | | | | | | 12/18/2003 | | | | 8 | | 56 | Allegany | 13 | M | | | | |  |
| A/New York/5/2004 | CY000896 | | | | I | | | | | II | | | | | | 1/6/2004 | | | | 11 | | 77 | Sullivan | 86 | M | | | | |  |
| A/New York/50/2003 | CY000096 | | | | I | | | | | II | | | | | | 12/8/2003 | | | | 7 | | 49 | Otsego | 15 | M | | | | |  |
| A/New York/51/2003 | CY001071 | | | | I | | | | | II | | | | | | 12/10/2003 | | | | 7 | | 49 | Westchester | 20 | M | | | | |  |
| A/New York/52/2004 | CY000264 | | | | III | | | | | I | | | | | | 2/5/2004 | | | | 15 | | 105 | Westchester | 20 | F | | | | |  |
| A/New York/53/2003 | CY000272 | | | | I | | | | | III | | | | | | 12/11/2003 | | | | 7 | | 49 | Nassau | 17 | F | | | | |  |
| A/New York/54/2003 | CY000104 | | | | I | | | | | II | | | | | | 12/10/2003 | | | | 7 | | 49 | Cattaraugus | 1m | M | | | | |  |
| A/New York/55/2003 | CY000956 | | | | I | | | | | IV | | | | | | 12/10/2003 | | | | 7 | | 49 | Nassau | 13 | F | | | | |  |
| A/New York/56/2003 | CY001212 | | | | I | | | | | II | | | | | | 12/16/2003 | | | | 8 | | 56 | Oneida | 43 | F | | | | |  |
| A/New York/58/2003 | CY001519 | | | | I | | | | | III | | | | | | 12/16/2003 | | | | 8 | | 56 | Herkimer | 28 | F | | | | |  |
| A/New York/59/2003 | CY000964 | | | | III | | | | | I | | | | | | 12/16/2003 | | | | 8 | | 56 | Montgomery | 44 | M | | | | |  |
| A/New York/6/2004 | CY001036 | | | | I | | | | | II | | | | | | 1/6/2004 | | | | 11 | | 77 | Sullivan | 65 | F | | | | |  |
| A/New York/60A/2003 | CY000112 | | | | I | | | | | II | | | | | | 12/15/2003 | | | | 8 | | 56 | Yates | 4 | M | | | | |  |
| A/New York/61A/2003 | CY000008 | | | | I | | | | | II | | | | | | 12/20/2003 | | | | 8 | | 56 | Herkimer | 57 | M | | | | |  |
| A/New York/62A/2003 | CY000924 | | | | I | | | | | II | | | | | | 12/19/2003 | | | | 8 | | 56 | Sullivan | 18 | F | | | | |  |
| A/New York/63/2003 | CY001220 | | | | I | | | | | II | | | | | | 12/29/2003 | | | | 10 | | 70 | Columbia | 2 | F | | | | |  |
| A/New York/64/2003 | CY000972 | | | | I | | | | | II | | | | | | 12/26/2003 | | | | 9 | | 63 | Chenango | 50 | F | | | | |  |
| A/New York/65/2003 | CY001228 | | | | I | | | | | III | | | | | | 12/29/2003 | | | | 10 | | 70 | Jefferson | 82 | F | | | | |  |
| A/New York/66/2003 | CY001348 | | | | I | | | | | II | | | | | | 12/23/2003 | | | | 9 | | 63 | Niagara | 18 | F | | | | |  |
| A/New York/67/2003 | CY000980 | | | | I | | | | | II | | | | | | 12/29/2003 | | | | 10 | | 70 | Westchester | 5 | M | | | | |  |
| A/New York/69/2004 | CY000568 | | | | I | | | | | IV | | | | | | 1/6/2004 | | | | 11 | | 77 | Jefferson | 5 | F | | | | |  |
| A/New York/7/2003 | CY001044 | | | | I | | | | | IV | | | | | | 10/31/2003 | | | | 1 | | 7 | Kings | 1 | F | | | | |  |
| A/New York/70/2004 | CY001236 | | | | I | | | | | II | | | | | | 1/6/2004 | | | | 11 | | 77 | Tompkins | 3 | ? | | | | |  |
| A/New York/8/2003 | CY001052 | | | | I | | | | | II | | | | | | 12/29/2003 | | | | 10 | | 70 | Kings | 21 | F | | | | |  |
| A/New York/9/2003 | CY001292 | | | | I | | | | | II | | | | | | 10/31/2003 | | | | 1 | | 7 | Richmond | 63 | M | | | | |  |
| *2004-05 Season* |  | | | | | | | | | | | | | | | | | | | | | | | | | | | | |  |
| A/New York/123/2004 | CY003079 | | | | I | I | | | | | | | 12/16/2004 | | | | | 14 | | | | 98 | Queens | 24 | M | | | | | |
| A/New York/190/2004 | CY002615 | | | | I | I | | | | | | | 11/11/2004 | | | | | 9 | | | | 63 | Onondaga | 32 | F | | | | | |
| A/New York/191/2005 | CY006130 | | | | I | I | | | | | | | 1/7/2005 | | | | | 17 | | | | 119 | Onondaga | 46 | F | | | | | |
| A/New York/206/2005 | CY006138 | | | | I | I | | | | | | | 1/19/2005 | | | | | 19 | | | | 133 | Wayne | 62 | F | | | | | |
| A/New York/207/2004 | CY002295 | | | | I | I | | | | | | | 12/9/2004 | | | | | 13 | | | | 91 | Suffolk | 79 | F | | | | | |
| A/New York/218/2004 | CY002511 | | | | I | I | | | | | | | 12/7/2004 | | | | | 13 | | | | 91 | Delaware | 18 | M | | | | | |
| A/New York/236/2004 | CY003415 | | | | I | I | | | | | | | 12/27/2004 | | | | | 16 | | | | 112 | Cattaraugus | 61 | F | | | | | |
| A/New York/237/2004 | CY003423 | | | | I | I | | | | | | | 12/16/2004 | | | | | 14 | | | | 98 | Franklin | 52 | M | | | | | |
| A/New York/238/2005 | CY006146 | | | | I | I | | | | | | | 2/1/2005 | | | | | 21 | | | | 147 | Tompkins | 20 | F | | | | | |
| A/New York/243/2005 | CY006154 | | | | I | I | | | | | | | 2/2/2005 | | | | | 21 | | | | 147 | Suffolk | 19 m | M | | | | | |
| A/New York/244/2004 | CY002087 | | | | I | I | | | | | | | 12/24/2004 | | | | | 15 | | | | 105 | Suffolk | 9 | M | | | | | |
| A/New York/258/2005 | CY006162 | | | | I | I | | | | | | | 1/18/2005 | | | | | 19 | | | | 133 | Niagara | 4 | F | | | | | |
| A/New York/334/2004 | CY002415 | | | | I | I | | | | | | | 12/21/2004 | | | | | 15 | | | | 105 | Manhattan | 39 | ? | | | | | |
| A/New York/351/2004 | CY003039 | | | | I | I | | | | | | | 11/6/2004 | | | | | 8 | | | | 56 | Oswego | 17 | F | | | | | |
| A/New York/353/2004 | CY002423 | | | | I | I | | | | | | | 11/5/2004 | | | | | 8 | | | | 56 | Onondaga | 87 | F | | | | | |
| A/New York/354/2004 | CY003343 | | | | I | I | | | | | | | 12/28/2004 | | | | | 16 | | | | 112 | Onondaga | 23 d | F | | | | | |
| A/New York/355/2004 | CY006122 | | | | I | I | | | | | | | 11/1/2004 | | | | | 8 | | | | 56 | Fulton | 46 | F | | | | | |
| A/New York/356/2004 | CY002183 | | | | I | I | | | | | | | 12/1/2004 | | | | | 12 | | | | 84 | Westchester | 56 | F | | | | | |
| A/New York/357/2005 | CY002191 | | | | I | I | | | | | | | 2/15/2005 | | | | | 23 | | | | 161 | Westchester | 18 | F | | | | | |
| A/New York/358/2004 | CY002591 | | | | I | I | | | | | | | 12/1/2004 | | | | | 12 | | | | 84 | Ontario | 87 | F | | | | | |
| A/New York/359/2005 | CY002007 | | | | I | I | | | | | | | 1/17/2005 | | | | | 19 | | | | 133 | Ontario | 18 | F | | | | | |
| A/New York/360/2004 | CY002431 | | | | I | I | | | | | | | 11/18/2004 | | | | | 10 | | | | 70 | Seneca | 35 | M | | | | | |
| A/New York/361/2005 | CY002015 | | | | I | I | | | | | | | 2/2/2005 | | | | | 21 | | | | 147 | Seneca | 38 | M | | | | | |
| A/New York/362/2004 | CY002439 | | | | I | I | | | | | | | 12/8/2004 | | | | | 13 | | | | 91 | Cayuga | 70 | M | | | | | |
| A/New York/364/2004 | CY003047 | | | | I | I | | | | | | | 12/28/2004 | | | | | 16 | | | | 112 | Albany | 48 | F | | | | | |
| A/New York/365/2004 | CY002447 | | | | I | I | | | | | | | 12/16/2004 | | | | | 14 | | | | 98 | Madison | 51 | M | | | | | |
| A/New York/366/2004 | CY002199 | | | | I | I | | | | | | | 12/20/2004 | | | | | 15 | | | | 105 | Cattaraugus | 37 | F | | | | | |
| A/New York/367/2005 | CY002455 | | | | I | I | | | | | | | 2/16/2005 | | | | | 23 | | | | 161 | Cattaraugus | 58 | F | | | | | |
| A/New York/369/2005 | CY002207 | | | | I | I | | | | | | | 1/3/2005 | | | | | 17 | | | | 119 | Onondaga | 57 | F | | | | | |
| A/New York/370/2004 | CY002215 | | | | I | I | | | | | | | 12/20/2004 | | | | | 15 | | | | 105 | Dutchess | 71 | M | | | | | |
| A/New York/371/2004 | CY002223 | | | | I | I | | | | | | | 12/9/2004 | | | | | 13 | | | | 91 | Queens | 18 | F | | | | | |
| A/New York/372/2004 | CY002231 | | | | I | I | | | | | | | 12/22/2004 | | | | | 15 | | | | 105 | Erie | 51 | M | | | | | |
| A/New York/373/2005 | CY002463 | | | | I | I | | | | | | | 2/22/2005 | | | | | 24 | | | | 168 | Erie | 23 | F | | | | | |
| A/New York/374/2004 | CY002239 | | | | I | I | | | | | | | 12/27/2004 | | | | | 16 | | | | 112 | Orleans | 23 | M | | | | | |
| A/New York/375/2005 | CY002247 | | | | I | I | | | | | | | 1/29/2005 | | | | | 20 | | | | 140 | Orleans | 20 | F | | | | | |
| A/New York/376/2005 | CY003055 | | | | I | I | | | | | | | 1/18/2005 | | | | | 19 | | | | 133 | Westchester | 1 | M | | | | | |
| A/New York/377/2004 | CY002599 | | | | I | I | | | | | | | 12/20/2004 | | | | | 15 | | | | 105 | Suffolk | 46 | F | | | | | |
| A/New York/378/2005 | CY002023 | | | | I | I | | | | | | | 1/3/2005 | | | | | 17 | | | | 119 | Suffolk | 16 | M | | | | | |
| A/New York/379/2004 | CY002031 | | | | I | I | | | | | | | 11/30/2004 | | | | | 12 | | | | 84 | Monroe | 29 | F | | | | | |
| A/New York/380/2004 | CY002607 | | | | I | I | | | | | | | 12/26/2004 | | | | | 16 | | | | 112 | Monroe | 86 | F | | | | | |
| A/New York/381/2004 | CY002255 | | | | I | I | | | | | | | 12/28/2004 | | | | | 16 | | | | 112 | Orleans | 43 | M | | | | | |
| A/New York/382/2005 | CY002039 | | | | I | I | | | | | | | 1/29/2005 | | | | | 20 | | | | 140 | Orleans | 24 | M | | | | | |
| A/New York/383/2004 | CY002263 | | | | I | I | | | | | | | 12/29/2004 | | | | | 16 | | | | 112 | St. Lawrence | 24 | M | | | | | |
| A/New York/384/2005 | CY002471 | | | | I | I | | | | | | | 1/6/2005 | | | | | 17 | | | | 119 | St. Lawrence | 30 | M | | | | | |
| A/New York/385/2004 | CY002479 | | | | I | I | | | | | | | 12/28/2004 | | | | | 16 | | | | 112 | Orleans | 43 | M | | | | | |
| A/New York/386/2004 | CY002047 | | | | I | I | | | | | | | 12/22/2004 | | | | | 15 | | | | 105 | Rockland | 45 | F | | | | | |
| A/New York/387/2004 | CY002055 | | | | I | I | | | | | | | 12/27/2004 | | | | | 16 | | | | 112 | Livingston | 16 | M | | | | | |
| A/New York/388/2005 | CY002271 | | | | I | I | | | | | | | 1/28/2005 | | | | | 20 | | | | 140 | Suffolk | 72 | M | | | | | |
| A/New York/389/2005 | CY003351 | | | | I | I | | | | | | | 1/4/2005 | | | | | 17 | | | | 119 | Rensselaer | 78 | F | | | | | |
| A/New York/390/2005 | CY002487 | | | | I | I | | | | | | | 1/5/2005 | | | | | 17 | | | | 119 | Schenectady | 78 | F | | | | | |
| A/New York/391/2005 | CY002063 | | | | I | I | | | | | | | 1/7/2005 | | | | | 17 | | | | 119 | Manhattan | 37 | F | | | | | |
| A/New York/392/2004 | CY002071 | | | | I | I | | | | | | | 12/21/2004 | | | | | 15 | | | | 105 | Tompkins | 16 | M | | | | | |
| A/New York/393/2005 | CY002495 | | | | I | I | | | | | | | 3/23/2005 | | | | | 28 | | | | 196 | Tompkins | 19 | M | | | | | |
| A/New York/395/2005 | CY003063 | | | | I | I | | | | | | | 1/24/2005 | | | | | 20 | | | | 140 | Broome | 19 | F | | | | | |
| A/New York/396/2005 | CY002079 | | | | I | I | | | | | | | 3/4/2005 | | | | | 25 | | | | 175 | Suffolk | 4 | F | | | | | |
| A/New York/461/2005 | CY006083 | | | | I | I | | | | | | | 2/2/2005 | | | | | 21 | | | | 147 | Nassau | 84 | M | | | | | |
| A/New York/462/2005 | CY006298 | | | | I | I | | | | | | | 2/8/2005 | | | | | 22 | | | | 154 | Nassau | 4 m | M | | | | | |
| A/New York/463/2005 | CY003647 | | | | I | I | | | | | | | 2/9/2005 | | | | | 22 | | | | 154 | Nassau | 64 | M | | | | | |
| A/New York/464/2005 | CY003655 | | | | I | I | | | | | | | 3/7/2005 | | | | | 26 | | | | 182 | Nassau | 86 | F | | | | | |
| A/New York/465/2005 | CY006091 | | | | I | I | | | | | | | 3/8/2005 | | | | | 26 | | | | 182 | Suffolk | 70 | M | | | | | |
| A/New York/466/2004 | CY006378 | | | | I | I | | | | | | | 11/27/2004 | | | | | 11 | | | | 77 | Nassau | 97 | M | | | | | |
| A/New York/467/2004 | CY006386 | | | | I | I | | | | | | | 9/17/2004 | | | | | 1 | | | | 7 | New York | 71 | F | | | | | |
| A/New York/468/2004 | CY003663 | | | | I | I | | | | | | | 9/17/2004 | | | | | 1 | | | | 7 | New York | 51 | M | | | | | |
| A/New York/469/2004 | CY006186 | | | | I | I | | | | | | | 9/20/2004 | | | | | 2 | | | | 14 | New York | 54 | F | | | | | |
| A/New York/470/2004 | CY006099 | | | | I | I | | | | | | | 9/27/2004 | | | | | 2 | | | | 14 | Nassau | 48 | M | | | | | |
| A/New York/471/2004 | CY003671 | | | | I | I | | | | | | | 11/8/2004 | | | | | 9 | | | | 63 | Nassau | 5 | F | | | | | |
| A/New York/98/2004 | CY002287 | | | | I | I | | | | | | | 11/4/2004 | | | | | 8 | | | | 56 | Queens | 80 | ? | | | | | |

*The GenBank accession numbers shown are for the PB2 gene only. Accession numbers for the remaining segments of each viral isolate are available at GenBank’s Influenza Virus Resource: http://www.ncbi.nlm.nih.gov/genomes/FLU/Database/select.cgi.
