# Supplementary material for: Stochastic Processes Are Key Determinants of Short-Term Evolution in Influenza A Virus
Source: PLOS journal article supplement (doi:10.1371/journal.ppat.0020125), 2006-01-01
Supplement: S3 (10.1371/journal.ppat.0020125.s003) [file journal.ppat.0020125.s003]

Table S3. **Data used in this study: Global background H3N2 isolates, 1997-2005: HA gene, 48 sequences.**

| **Isolate** | **GenBank**  **Accession**  **Number** | **Isolate** | **GenBank**  **Accession**  **Number** |
| --- | --- | --- | --- |
| A/Ashburton/280/2004 | CY002954 | A/Memphis/31/03 | CY002104 |
| A/Christchurch/10/2004 | CY002905 | A/Memphis/59/99 | CY002112 |
| A/Christchurch/13/2004 | CY002906 | A/Moscow/10/99 | AY531035 |
| A/Christchurch/14/2004 | CY002922 | A/Moscow/328/2003 | DQ086160 |
| A/Christchurch/15/2004 | CY002914 | A/Moscow/343/2003 | DQ089634 |
| A/Christchurch/184/2004 | CY002946 | A/Moscow/346/2003 | DQ089638 |
| A/Christchurch/339/2004 | CY002904 | A/Nagasaki/76/98 | AB019355 |
| A/Denmark/07/03 | AY531041 | A/Nagasaki/93/98 | AB019356 |
| A/Denmark/10/03 | AY531046 | A/Oklahoma/323/03 | DQ059385 |
| A/Denmark/13/03 | AY531056 | A/Paris/896/97 | AF363502 |
| A/Denmark/18-2/03 | AY531059 | A/Paris/906/97 | AF363503 |
| A/Denmark/19-2/03 | AY531053 | A/Paris/908/97 | AF363504 |
| A/Denmark/32/03 | AY531042 | A/swine/Guangdong/1/2003 | AY852273 |
| A/Denmark/41/03 | AY531048 | A/swine/Guangdong/3/2003 | AY852274 |
| A/Denmark/52/03 | AY531052 | A/swine/Guangdong/4/2003 | AY852275 |
| A/Denmark/58/03 | AY531040 | A/swine/Guangdong/6/2004 | AY852277 |
| A/Denmark/61/03 | AY531049 | A/Swine/Ontario/00130/97 | AF251395 |
| A/Denmark/63/03 | AY531045 | A/Switzerland/7729/98 | AF382318 |
| A/Denmark/70/03 | AY531051 | A/Taiwan/30005/2004 | DQ249261 |
| A/Denmark/92/03 | AY531055 | A/Taiwan/31001/2004 | DQ249262 |
| A/Fujian/411/02-like | DQ227423 | A/Taiwan/3640/2003 | DQ249259 |
| A/Hong Kong/1143/99 | AF382319 | A/Wyoming/3/03 | AY531033 |
| A/Hong Kong/1144/99 | AF382321 |  |  |
| A/Hong Kong/1179/99 | AF382324 |  |  |
| A/Hong Kong/1180/99 | AY035591 |  |  |
| A/Memphis/31/98 | AY271794 |  | |
